# Supplementary material for: Introducing CRYOWRF v1.0: multiscale atmospheric flow simulations with advanced snow cover modelling
Source: Copernicus journal article supplement (doi:10.5194/gmd-16-719-2023), 2023-01-30
Supplement: Supplementary file 1 [file gmd-16-719-2023-supplement.zip]

Archive with 4 entries (3 files):
- gmd-16-719-2023-supplement-title-page.pdf
- movies/
- movies/Supplementary_Movie_M1.mp4
- movies/Supplementary_Movie_M2.mp4
