# Supplementary material for: Introducing CRYOWRF v1.0: multiscale atmospheric flow simulations with advanced snow cover modelling
Source: Copernicus journal article supplement (doi:10.5194/gmd-16-719-2023), 2023-01-30
Supplement: Supplementary file 1 [file gmd-16-719-2023-supplement.zip › gmd-16-719-2023-supplement-title-page.pdf]

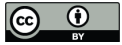

*Supplement of*

## **Introducing CRYOWRF v1.0: multiscale atmospheric flow simulations with advanced snow cover modelling**

**Varun Sharma et al.**

*Correspondence to:* Varun Sharma ([varun.sharma@epfl.ch](mailto:varun.sharma@epfl.ch))

- [gmd-16-719-2023-supplement-title-page.pdf](#)
- [movies](#)
  - [Supplementary\\_Movie\\_M1.mp4](#)
  - [Supplementary\\_Movie\\_M2.mp4](#)

The copyright of individual parts of the supplement might differ from the article licence.
